# Supplementary material for: Vitamin D Supplementation Does Not Influence SARS-CoV-2 Vaccine Efficacy or Immunogenicity: Sub-Studies Nested within the CORONAVIT Randomised Controlled Trial
Source: MDPI journal article supplement (doi:10.3390/nu14183821), 2022-09-16
Supplement: s1 [file s1]

# **Vitamin D Supplementation does not influence SARS-CoV-2 Vaccine Efficacy or Immunogenicity: Sub-studies Nested within the CORONAVIT Randomised Controlled Trial.**

## Supplementary Appendix

### Contents

|                                                                                                                                                                                                                                |   |
|--------------------------------------------------------------------------------------------------------------------------------------------------------------------------------------------------------------------------------|---|
| <b>Table S1.</b> Baseline characteristics of participants contributing data to analysis of post-vaccination anti-S IgGAM titres (sub-study 2), by allocation .....                                                             | 2 |
| <b>Table S2.</b> Baseline characteristics of participants contributing data to analysis of neutralising antibody titres and cellular responses (sub-study 3), by allocation .....                                              | 3 |
| <b>Table S3:</b> Dichotomous outcomes by allocation.....                                                                                                                                                                       | 4 |
| <b>Table S4:</b> Continuous immunological outcomes by allocation: intervention arms pooled .....                                                                                                                               | 5 |
| <b>Table S5:</b> Sensitivity analysis: vaccine efficacy analysis in participants who did not report previous SARS-CoV-2 infection.....                                                                                         | 7 |
| <b>Table S6:</b> Sensitivity analysis: dichotomous outcomes by allocation in participants who did not report previous SARS-CoV-2 infection.....                                                                                | 7 |
| <b>Table S7:</b> Sensitivity analysis: continuous immunological outcomes in participants who did not report previous SARS-CoV-2 infection.....                                                                                 | 7 |
| <b>Table S8:</b> Exploratory responder analysis, comparing major immunological outcomes among participants randomised to either intervention arm who did vs. did not achieve end-trial 25(OH)D concentrations >75 nmol/L. .... | 8 |

**Table S1.** Baseline characteristics of participants contributing data to analysis of post-vaccination anti-S IgGAM titres (sub-study 2), by allocation

|                                                       | Overall (n=1853)        | No offer (n=555) | 800 IU/day offer (n=646) | 3200 IU/day offer (n=652) |
|-------------------------------------------------------|-------------------------|------------------|--------------------------|---------------------------|
| Age, years                                            |                         |                  |                          |                           |
| Median (IQR)                                          | 63.6 (57.0–69.3)        | 63.5 (57.2–69.2) | 63.0 (56.5–68.8)         | 64.1 (57.0–70.1)          |
| Range                                                 | 16.6–87.2               | 18.4–82.8        | 26.8–83.1                | 16.6–87.2                 |
| Sex                                                   |                         |                  |                          |                           |
| Female                                                | 1,228 (66.3%)           | 341 (61.4%)      | 447 (69.2%)              | 440 (67.5%)               |
| Male                                                  | 625 (33.7%)             | 214 (38.6%)      | 199 (30.8%)              | 212 (32.5%)               |
| Ethnicity                                             |                         |                  |                          |                           |
| White                                                 | 1,805 (97.4%)           | 546 (98.4%)      | 629 (97.4%)              | 630 (96.6%)               |
| Asian/Asian British                                   | 12 (0.6%)               | 4 (0.7%)         | 0                        | 8 (1.2%)                  |
| Black/African/Caribbean/Black British                 | 4 (0.2%)                | 1 (0.2%)         | 2 (0.3%)                 | 1 (0.2%)                  |
| Mixed/Multiple/Other                                  | 32 (1.7%)               | 4 (0.7%)         | 15 (2.3%)                | 13 (2.0%)                 |
| Body-mass index, kg/m <sup>2</sup>                    |                         |                  |                          |                           |
| <25                                                   | 832 (45.0%)             | 238 (43.0%)      | 289 (44.9%)              | 305 (46.8%)               |
| 25–30                                                 | 657 (35.5%)             | 208 (37.6%)      | 216 (33.5%)              | 233 (35.7%)               |
| >30                                                   | 360 (19.5%)             | 107 (19.3%)      | 139 (21.6%)              | 114 (17.5%)               |
| Self-assessed general health                          |                         |                  |                          |                           |
| Excellent                                             | 417 (22.5%)             | 131 (23.6%)      | 136 (21.1%)              | 150 (23.0%)               |
| Very good                                             | 786 (42.4%)             | 250 (45.0%)      | 276 (42.7%)              | 260 (39.9%)               |
| Good                                                  | 469 (25.3%)             | 116 (20.9%)      | 177 (27.4%)              | 176 (27.0%)               |
| Fair                                                  | 143 (7.7%)              | 48 (8.6%)        | 45 (7.0%)                | 50 (7.7%)                 |
| Poor                                                  | 37 (2.0%)               | 10 (1.8%)        | 12 (1.9%)                | 15 (2.3%)                 |
| Medically diagnosed disease                           |                         |                  |                          |                           |
| Hypertension                                          | 409 (22.1%)             | 131 (23.6%)      | 137 (21.2%)              | 141 (21.6%)               |
| Diabetes                                              | 96 (5.2%)               | 33 (5.9%)        | 24 (3.7%)                | 39 (6.0%)                 |
| Heart disease                                         | 77 (4.2%)               | 25 (4.5%)        | 26 (4.0%)                | 26 (4.0%)                 |
| Asthma                                                | 244 (13.2%)             | 66 (11.9%)       | 102 (15.8%)              | 76 (11.7%)                |
| COPD                                                  | 32 (1.7%)               | 12 (2.2%)        | 11 (1.7%)                | 9 (1.4%)                  |
| Previous SARS-CoV-2 infection <sup>(1)</sup>          | 75 (4.1%)               | 19 (3.5%)        | 35 (5.4%)                | 21 (3.3%)                 |
| Type of vaccine administered, primary course          |                         |                  |                          |                           |
| 2 × ChAdOx1                                           | 1,280 (69.1%)           | 389 (70.1%)      | 463 (71.7%)              | 428 (65.6%)               |
| 2 × BNT162b2                                          | 559 (30.2%)             | 161 (29.0%)      | 180 (27.9%)              | 218 (33.4%)               |
| Other <sup>(2)</sup>                                  | 14 (0.8%)               | 5 (0.9%)         | 3 (0.5%)                 | 6 (0.9%)                  |
| Inter-dose interval, days                             | 77 (70–79)              | 77 (70–79)       | 77 (70–79)               | 77 (70–79)                |
| Interval from second vaccine dose to DBS sample, days | 54 (41–70)              | 56 (41–71)       | 52 (41–67)               | 55 (41–71)                |
| Mean 25(OH)D, nmol/L (SD) [range] <sup>(3)</sup>      | 40.5 (14.3) [10.3–73.3] | — <sup>(4)</sup> | 40.4 (14.5) [10.3–73.5]  | 40.7 (14.2) [10.3–73.2]   |
| <25.0                                                 | 183 (9.9%)              | — <sup>(4)</sup> | 96 (14.9%)               | 87 (13.3%)                |
| 25.0 to <50.0                                         | 766 (41.3%)             | — <sup>(4)</sup> | 376 (58.2%)              | 390 (59.8%)               |
| 50.0 to <75.0                                         | 344 (18.6%)             | — <sup>(4)</sup> | 172 (26.6%)              | 172 (26.4%)               |
| ≥75.0                                                 | 0                       | — <sup>(4)</sup> | 0                        | 0                         |
| Not determined                                        | 560 (30.2%)             | 555 (100.0%)     | 2 (0.3%)                 | 3 (0.5%)                  |

Data are n (%) or median (IQR) unless specified otherwise. Abbreviations: anti-S IgGAM, combined anti-Spike IgG, IgA and IgM response; IQR, interquartile range; DBS, dried blood spot; SD, standard deviation; 25(OH)D, 25-hydroxyvitamin D. (1) Reported test-positive infection before provision of DBS sample. (2) One participant receiving 2 × Moderna (3200 IU/day offer), two participants receiving 2 × Novavax (no offer), two participants receiving 2 × Valneva (3200 IU/day offer), eight participants receiving a combination of vaccines (3200 IU/offer: n=3; 800 IU/day offer: n=3; no offer: n=2), and one participant unknown vaccine types (no offer). (3) Missing values: 25(OH)D concentration missing for three participants in 3200 IU/day arm and two participants in 800 IU/day arm. (4) Baseline 25(OH)D not determined for participants randomly assigned to the no offer arm.

**Table S2.** Baseline characteristics of participants contributing data to analysis of neutralising antibody titres and cellular responses (sub-study 3), by allocation

|                                                         | Overall (n=100)  | No offer (n=31)  | 800 IU/day offer (n=29) | 3200 IU/day offer (n=40) |
|---------------------------------------------------------|------------------|------------------|-------------------------|--------------------------|
| Age, years                                              |                  |                  |                         |                          |
| Median (IQR)                                            | 66.5 (61.4–68.9) | 66.5 (59.7–69.5) | 66.6 (64.2–69.0)        | 66.4 (62.0–68.3)         |
| Range                                                   | 16.6–87.2        | 18.4–82.8        | 26.8–83.1               | 16.6–87.2                |
| Sex                                                     |                  |                  |                         |                          |
| Female                                                  | 59 (58.4%)       | 15 (48.4%)       | 19 (65.5%)              | 25 (62.5%)               |
| Male                                                    | 41 (41.0%)       | 16 (51.6%)       | 10 (34.5%)              | 15 (37.5%)               |
| Ethnicity                                               |                  |                  |                         |                          |
| White                                                   | 96 (96.0%)       | 30 (96.8%)       | 27 (93.1%)              | 39 (97.5%)               |
| Asian/Asian British                                     | 1 (1.0%)         | 0                | 0                       | 1 (2.5%)                 |
| Black/African/Caribbean/Black British                   | 0                | 0                | 0                       | 0                        |
| Mixed/Multiple/Other                                    | 3 (3.0%)         | 1 (3.2%)         | 2 (6.9%)                | 0                        |
| Body-mass index, kg/m <sup>2</sup>                      |                  |                  |                         |                          |
| <25                                                     | 45 (45.0%)       | 15 (48.4%)       | 13 (44.8%)              | 17 (42.5%)               |
| 25–30                                                   | 44 (44.0%)       | 15 (48.4%)       | 11 (37.9%)              | 18 (45.0%)               |
| >30                                                     | 11 (11.0%)       | 1 (3.2%)         | 5 (17.2%)               | 5 (12.5%)                |
| Self-assessed general health                            |                  |                  |                         |                          |
| Excellent                                               | 26 (26.0%)       | 7 (22.6%)        | 7 (24%)                 | 12 (30.8%)               |
| Very good                                               | 39 (39.0%)       | 10 (32.3%)       | 13 (45%)                | 16 (41.0%)               |
| Good                                                    | 28 (28.0%)       | 10 (32.3%)       | 8 (28.0%)               | 10 (25.6%)               |
| Fair                                                    | 5 (5.0%)         | 4 (12.9%)        | 0                       | 1 (2.6%)                 |
| Poor                                                    | 1 (1.0%)         | 0                | 1 (3.0%)                | 0                        |
| Medically diagnosed disease                             |                  |                  |                         |                          |
| Hypertension                                            | 27 (27.0%)       | 7 (22.6%)        | 9 (31.0%)               | 11 (27.5%)               |
| Diabetes                                                | 8 (8.0%)         | 3 (9.7%)         | 0                       | 5 (12.5%)                |
| Heart disease                                           | 3 (3.0%)         | 1 (3.2%)         | 0                       | 2 (5.0%)                 |
| Asthma                                                  | 14 (14.0%)       | 4 (12.9%)        | 7 (24.1%)               | 3 (7.5%)                 |
| COPD                                                    | 2 (2.0%)         | 1 (3.2%)         | 1 (3.4%)                | 0                        |
| Previous SARS-CoV-2 infection <sup>(1)</sup>            | 2 (2.0%)         | 0                | 0                       | 2 (5.0%)                 |
| Type of vaccine administered, primary course            |                  |                  |                         |                          |
| 2 × ChAdOx1                                             | 67 (67.0%)       | 22 (71.0%)       | 22 (75.9%)              | 23 (57.5%)               |
| 2 × BNT162b2                                            | 33 (33.0%)       | 9 (29.0%)        | 7 (24.1%)               | 17 (42.5%)               |
| Other                                                   | 0                | 0                | 0                       | 0                        |
| Inter-dose interval, days                               | 76 (70–78)       | 75 (70–78)       | 77 (70–80)              | 76 (70–78)               |
| Interval from second vaccine dose to blood sample, days | 82 (69–103)      | 82 (65–93)       | 81 (65–101)             | 83 (71–125)              |
| Mean 25(OH)D, nmol/L (SD) [range] <sup>(2)</sup>        | 39.3 (13.1)      | — <sup>(2)</sup> | 38.2 (14.1)             | 40.1 (12.4)              |
| <25.0                                                   | 8 (8.0%)         | — <sup>(2)</sup> | 4 (13.8%)               | 4 (10.0%)                |
| 25.0 to <50.0                                           | 48 (48.0%)       | — <sup>(2)</sup> | 21 (72.4%)              | 27 (67.5%)               |
| 50.0 to <75.0                                           | 13 (13.0%)       | — <sup>(2)</sup> | 4 (13.8%)               | 9 (22.5%)                |
| ≥75.0                                                   | 0                | — <sup>(2)</sup> | 0                       | 0                        |
| Not determined                                          | 31 (31.0%)       | 31 (100.0%)      | 0                       | 0                        |

Data are n (%) or median (IQR) unless specified otherwise. Abbreviations: IQR, interquartile range; SD, standard deviation; 25(OH)D, 25-hydroxyvitamin D. (1) Reported test-positive infection before provision of blood sample. (2) Baseline 25(OH)D not determined for participants randomly assigned to the no-offer arm.

**Table S3:** Dichotomous outcomes by allocation

|                                                                                       | No offer        | 800 IU/day offer | 3200 IU/day offer | Either offer      | 800 IU/day vs no offer |       | 3200 IU/day vs no offer |       | Either offer vs no offer |       |
|---------------------------------------------------------------------------------------|-----------------|------------------|-------------------|-------------------|------------------------|-------|-------------------------|-------|--------------------------|-------|
|                                                                                       |                 |                  |                   |                   | Adjusted OR (95% CI)   | P     | Adjusted OR (95% CI)    | P     | Adjusted OR (95% CI)     | P     |
| Proportion with breakthrough SARS-CoV-2 infection, sub-study 1                        | 49/908 (5.4%)   | 66/944 (7.0%)    | 59/956 (6.2%)     | 125/1900 (6.6%)   | 1.34 (0.91 to 1.97)*   | 0.141 | 1.19 (0.80 to 1.76)*    | 0.392 | 1.26 (0.89 to 1.77)*     | 0.192 |
| Proportion of participants with detectable anti-S IgGAM post vaccination, sub-study 2 | 533/555 (96.0%) | 628/646 (97.2%)  | 638/652 (97.9%)   | 1266/1298 (97.5%) | 1.29 (0.64 to 2.60)**  | 0.474 | 1.66 (0.80 to 3.42)**   | 0.172 | 1.42 (0.78 to 2.59)**    | 0.248 |

Abbreviations: IQR, interquartile range; OR, odds ratio. \*Adjusted for age, sex, educational attainment, frontline worker status, number of people per bedroom, schoolchildren (5–15 years) at home with participant, primary vaccination course, previous SARS-CoV-2 infection, season of first vaccination, inter-dose interval, and use of anticholinergics. \*\*Adjusted for age, sex, body-mass index, days from second vaccine dose to DBS sample, general health, season of second vaccination, inter-dose interval, primary vaccination course, and previous SARS-CoV-2 infection.

**Table S4:** Continuous immunological outcomes by allocation: intervention arms pooled

|                                                                                            | No offer                         | Either offer                     | Adjusted % difference for either offer vs. no offer (95% CI)* | P†    |
|--------------------------------------------------------------------------------------------|----------------------------------|----------------------------------|---------------------------------------------------------------|-------|
| <b>Sub-study 2</b>                                                                         |                                  |                                  |                                                               |       |
| Anti-S IgGAM ratio                                                                         | 2.8 (1.9 to 3.9) [n=555]         | 2.9 (1.9 to 4.1) [n=1298]        | -46.6% (-85.6 to 98.0)                                        | 0.344 |
| <b>Sub-study 3</b>                                                                         |                                  |                                  |                                                               |       |
| Neutralising antibody titre                                                                | 186.9 (119.8 to 406.7) [n=29]    | 237.6 (81.2 to 492.3) [n=66]     | -2.4% (-39.5 to 57.5)                                         | 0.920 |
| S peptide-stimulated IFN- $\gamma$ in whole blood supernatant, ng/mL                       | 0.011 (0.003 to 0.025) [n=29]    | 0.013 (0.005 to 0.037) [n=65]    | 59.1% (-22.2 to 225.3)                                        | 0.200 |
| S peptide-stimulated TNF in whole blood supernatant, ng/mL                                 | 0.000 (0.000 to 0.003) [n=29]    | 0.000 (0.000 to 0.005) [n=67]    | -45.1% (-78.1 to 37.5)                                        | 0.197 |
| S peptide-stimulated IL-6 in whole blood supernatant, ng/mL                                | 0.136 (0.012 to 0.719) [n=28]    | 0.125 (0.000 to 1.909) [n=66]    | -48.2% (-88.1 to 125.0)                                       | 0.375 |
| S peptide-stimulated CXCL-8 in whole blood supernatant, ng/mL                              | 0.790 (0.254 to 2.563) [n=26]    | 0.909 (0.371 to 5.917) [n=66]    | 13.7% (-61.1 to 233.0)                                        | 0.812 |
| LPS-stimulated IFN- $\gamma$ in whole blood supernatant, ng/mL                             | 0.020 (0.004 to 0.067) [n=29]    | 0.028 (0.007 to 0.072) [n=65]    | 29.7% (-46.5 to 214.3)                                        | 0.561 |
| LPS-stimulated TNF in whole blood supernatant, ng/mL                                       | 0.542 (0.465 to 0.919) [n=29]    | 0.513 (0.319 to 0.923) [n=68]    | -37.2% (-72.7 to 44.4)                                        | 0.270 |
| LPS-stimulated IL-6 in whole blood supernatant, ng/mL                                      | 54.768 (32.362 to 73.147) [n=29] | 44.478 (30.651 to 81.109) [n=68] | 3.1% (-27.6 to 46.8)                                          | 0.865 |
| LPS-stimulated CXCL-8 in whole blood supernatant, ng/mL                                    | 4.231 (2.322 to 6.373) [n=28]    | 2.642 (2.072 to 4.341) [n=68]    | -20.2% (-44.2 to 14.2)                                        | 0.214 |
| Percentage of S peptide-stimulated CD3+CD4+ cells positive for intracellular IFN- $\gamma$ | 0.00% (0.00 to 0.02) [n=29]      | 0.00% (0.00 to 0.02) [n=64]      | -23.1% (-53.4 to 26.9)                                        | 0.299 |
| Percentage of CD3-stimulated CD3+CD4+ cells positive for intracellular IFN- $\gamma$       | 0.04% (0.00 to 0.12) [n=29]      | 0.10% (0.02 to 0.39) [n=63]      | 193.8% (11.0 to 677.8)                                        | 0.030 |
| Percentage of S peptide-stimulated CD3+CD8+ cells positive for intracellular IFN- $\gamma$ | 0.00% (0.00 to 0.04) [n=29]      | 0.00% (0.00 to 0.06) [n=64]      | 18.9% (-40.6 to 138.0)                                        | 0.621 |
| Percentage of CD3-stimulated CD3+CD8+ cells positive for intracellular IFN- $\gamma$       | 0.62% (0.18 to 2.15) [n=29]      | 0.95% (0.26 to 2.09) [n=63]      | 76.3% (-22.4 to 300.6)                                        | 0.173 |
| Percentage of S peptide-stimulated CD3+CD4+ cells positive for intracellular IL-2          | 0.00% (0.00 to 0.02) [n=29]      | 0.01% (0.00 to 0.02) [n=64]      | 26.8% (-11.7 to 81.9)                                         | 0.195 |
| Percentage of CD3-stimulated CD3+CD4+ cells positive for intracellular IL-2                | 0.12% (0.09 to 0.25) [n=29]      | 0.18% (0.07 to 0.35) [n=63]      | 51.3% (-13.7 to 165.5)                                        | 0.146 |
| Percentage of S peptide-stimulated CD3+CD8+ cells positive for intracellular IL-2          | 0.00% (0.00 to 0.00) [n=29]      | 0.00% (0.00 to 0.00) [n=64]      | 21.4% (-17.7 to 78.9)                                         | 0.323 |
| Percentage of CD3-stimulated CD3+CD8+ cells positive for intracellular IL-2                | 0.13% (0.05 to 0.26) [n=29]      | 0.18% (0.08 to 0.41) [n=63]      | 60.6% (-13.1 to 196.8)                                        | 0.129 |
| Percentage of S peptide-stimulated CD3+CD4+ cells positive for intracellular TNF           | 0.00% (0.00 to 0.00) [n=29]      | 0.00% (0.00 to 0.02) [n=64]      | 36.1% (-24.2 to 144.3)                                        | 0.297 |
| Percentage of CD3-stimulated CD3+CD4+ cells positive for intracellular TNF                 | 0.37% (0.19 to 0.67) [n=29]      | 0.73% (0.24 to 1.31) [n=63]      | 90.0% (-3.7 to 275.1)                                         | 0.064 |
| Percentage of S peptide-stimulated CD3+CD8+ cells positive for intracellular TNF           | 0.02% (0.00 to 0.06) [n=29]      | 0.00% (0.00 to 0.10) [n=64]      | -31.9% (-70.1 to 54.8)                                        | 0.354 |
| Percentage of CD3-stimulated CD3+CD8+ cells positive for intracellular TNF                 | 1.45% (0.72 to 3.84) [n=29]      | 2.48% (1.05 to 4.40) [n=63]      | 135.2% (4.9 to 427.3)                                         | 0.038 |
| Percentage of CD3+CD4+ cells with naive phenotype                                          | 35.8% (21.7 to 48.7) [n=29]      | 36.5% (21.5 to 42.9) [n=64]      | -3.6% (-22.4 to 19.7)                                         | 0.737 |
| Percentage of CD3+CD8+ cells with naive phenotype                                          | 32.5% (22.9 to 42.6) [n=29]      | 24.6% (19.6 to 34.9) [n=64]      | -13.7% (-28.9 to 4.7)                                         | 0.134 |
| Percentage of CD3+CD4+ cells with central memory phenotype                                 | 33.5% (26.6 to 40.6) [n=29]      | 36.5% (30.8 to 46.1) [n=64]      | 18.5% (1.1 to 39.1)                                           | 0.037 |
| Percentage of CD3+CD8+ cells with central memory phenotype                                 | 20.5% (13.9 to 28.8) [n=29]      | 23.0% (14.1 to 30.5) [n=64]      | 19.7% (-8.8 to 57.2)                                          | 0.192 |
| Percentage of CD3+CD4+ cells with effector memory phenotype                                | 11.7% (7.3 to 15.7) [n=29]       | 13.6% (9.5 to 17.8) [n=64]       | 13.2% (-9.5 to 41.4)                                          | 0.274 |

|                                                             | No offer                    | Either offer                | Adjusted % difference for either offer vs. no offer (95% CI)* | P†    |
|-------------------------------------------------------------|-----------------------------|-----------------------------|---------------------------------------------------------------|-------|
| Percentage of CD3+CD8+ cells with effector memory phenotype | 8.2% (5.6 to 12.7) [n=29]   | 12.0% (7.1 to 15.1) [n=64]  | 34.3% (2.8 to 75.4)                                           | 0.031 |
| Percentage of CD3+CD4+ cells with EMRA phenotype            | 3.9% (2.4 to 7.9) [n=29]    | 3.4% (2.2 to 5.8) [n=64]    | -32.4% (-53.6 to -1.6)                                        | 0.041 |
| Percentage of CD3+CD8+ cells with EMRA phenotype            | 14.9% (10.3 to 29.7) [n=29] | 19.6% (11.2 to 27.6) [n=64] | 7.8% (-21.3 to 47.7)                                          | 0.638 |

Data are median (IQR) [n] unless otherwise specified. Values below the limit of detection are presented as 0. \*Adjusted for age, sex, ethnicity, body-mass index, days from second vaccine dose to DBS sample, general health, inter-dose interval, and primary vaccination course. †Correction for multiple testing using the Benjamin and Hochberg procedure provides a critical p value of 0.0017. EMRA, terminally differentiated effector memory cells re-expressing CD45RA.

**Table S5:** Sensitivity analysis: vaccine efficacy analysis in participants who did not report previous SARS-CoV-2 infection

|                                                        | No offer         | 800 IU/day offer | 3200 IU/day offer | Either offer    | 800 IU/day vs no offer |       | 3200 IU/day vs no offer |       | Either offer vs no offer |       |
|--------------------------------------------------------|------------------|------------------|-------------------|-----------------|------------------------|-------|-------------------------|-------|--------------------------|-------|
|                                                        |                  |                  |                   |                 | Adjusted HR (95% CI)   | P     | Adjusted HR (95% CI)    | P     | Adjusted HR (95% CI)     | P     |
| Median days to breakthrough SARS-CoV-2 infection (IQR) | 123 (100 to 145) | 127 (90 to 146)  | 103 (58 to 139)   | 117 (73 to 145) | 1.27 (0.88 to 1.83)    | 0.208 | 1.16 (0.80 to 1.69)     | 0.427 | 1.23 (0.89 to 1.70)      | 0.221 |

**Table S6:** Sensitivity analysis: dichotomous outcomes by allocation in participants who did not report previous SARS-CoV-2 infection

|                                                                                       | No offer        | 800 IU/day offer | 3200 IU/day offer | Either offer      | 800 IU/day vs no offer |       | 3200 IU/day vs no offer |       | Either offer vs no offer |       |
|---------------------------------------------------------------------------------------|-----------------|------------------|-------------------|-------------------|------------------------|-------|-------------------------|-------|--------------------------|-------|
|                                                                                       |                 |                  |                   |                   | Adjusted OR (95% CI)   | P     | Adjusted OR (95% CI)    | P     | Adjusted OR (95% CI)     | P     |
| Proportion with breakthrough SARS-CoV-2 infection, sub-study 1                        | 48/870 (5.5%)   | 65/889 (7.3%)    | 59/928 (6.4%)     | 124/1817 (6.8%)   | 1.34 (0.91 to 1.99)*   | 0.136 | 1.18 (0.80 to 1.76)*    | 0.402 | 1.27 (0.90 to 1.79)*     | 0.175 |
| Proportion of participants with detectable anti-S IgGAM post vaccination, sub-study 2 | 514/536 (95.9%) | 593/611 (97.1%)  | 617/631 (97.8%)   | 1219/1242 (98.1%) | 1.32 (0.66 to 2.65)**  | 0.439 | 1.75 (0.85 to 3.60)**   | 0.129 | 1.49 (0.82 to 2.69)**    | 0.189 |

Abbreviations: IQR, interquartile range; OR, odds ratio. \*Adjusted for age, sex, educational attainment, frontline worker status, number of people per bedroom, schoolchildren (5–15 years) at home with participant, primary vaccination course, previous SARS-CoV-2 infection, season of first vaccination, inter-dose interval, and use of anticholinergics. \*\*Adjusted for age, sex, body-mass index, days from second vaccine dose to DBS sample, general health, season of second vaccination, inter-dose interval, primary vaccination course, and previous SARS-CoV-2 infection.

**Table S7:** Sensitivity analysis: continuous immunological outcomes in participants who did not report previous SARS-CoV-2 infection

|                                                                            | No offer                      | 800 IU/day offer              | 3200 IU/day offer             | Either offer                  | 800 IU/day offer vs. no offer   |       | 3200 IU/day vs. no offer        |       | Either offer vs. no offer       |       |
|----------------------------------------------------------------------------|-------------------------------|-------------------------------|-------------------------------|-------------------------------|---------------------------------|-------|---------------------------------|-------|---------------------------------|-------|
|                                                                            |                               |                               |                               |                               | Adjusted % difference (95% CI)* | P     | Adjusted % difference (95% CI)* | P     | Adjusted % difference (95% CI)* | P     |
| Anti-S IgGAM ratio (sub-study 2)                                           | 2.7 (1.9 to 3.8) [n=536]      | 2.8 (1.9 to 3.9) [n=611]      | 2.8 (1.9 to 4.0) [n=631]      | 2.8 (1.9 to 4.0) [n=1242]     | -64.4% (-92.9 to 78.5)          | 0.204 | -59.9% (-91.5 to 88.9)          | 0.242 | -66.3% (-89.8 to 11.4)          | 0.074 |
| S peptide-stimulated IFN-γ in whole blood supernatant, ng/mL (sub-study 3) | 0.011 (0.003 to 0.025) [n=29] | 0.013 (0.005 to 0.046) [n=28] | 0.013 (0.005 to 0.024) [n=37] | 0.013 (0.005 to 0.037) [n=65] | 2.3% (-6.6 to 12.1)             | 0.616 | -0.5% (-4.8 to 4.0)             | 0.823 | 1.7% (-4.0 to 7.6)              | 0.568 |

Data are median (IQR) [n] unless otherwise specified. Values below the limit of detection are presented as 0. \*Adjusted for age, sex, ethnicity, body-mass index, pre-vaccination anti-S IgGAM, days from second vaccine dose to DBS sample, general health, inter-dose interval, and primary vaccination course.

**Table S8:** Exploratory responder analysis, comparing major immunological outcomes among participants randomised to either intervention arm who did vs. did not achieve end-trial 25(OH)D concentrations >75 nmol/L.

|                                                       | Participants achieving end-trial 25(OH)D ≥75 nmol/L | Participants achieving end-trial 25(OH)D <75 nmol/L | Adjusted percentage difference for ≥75 nmol/L vs <75 nmol/L* | p value |
|-------------------------------------------------------|-----------------------------------------------------|-----------------------------------------------------|--------------------------------------------------------------|---------|
| Post-vaccination anti-Spike IgGAM serology ratio      | 3.0 (2.1 to 4.1) [n=162]                            | 2.5 (1.9 to 4.0) [n=45]                             | 17.6% (-0.3 to 38.8)                                         | 0.054   |
| Neutralising antibody titre                           | 234.0 (76.3 to 492.3) [n=57]                        | 241.1 (169.1 to 308.8) [n=9]                        | -26.2% (-67.9 to 69.4)                                       | 0.466   |
| S peptide-stimulated IFN-γ in whole blood supernatant | 0.013 (0.005 to 0.033) [n=56]                       | 0.034 (0.007 to 0.049) [n=9]                        | -37.0% (-81.6 to 115.8)                                      | 0.455   |

Data are median (IQR) [n] unless otherwise specified. \*Adjusted for age, sex, ethnicity, body-mass index, pre-vaccination anti-S IgGAM, days from second vaccine dose to DBS sample, general health, inter-dose interval, and primary vaccination course. Analysis restricted to participants randomised to either intervention arm, and classified according to total 25(OH)D values measured at study end, not by allocation.
